1 **Dog color patterns explained by modular promoters of ancient canid origin**

2 Danika L. Bannasch\*<sup>1,2</sup>, Christopher B. Kaelin\*<sup>3,4</sup>, Anna Letko<sup>2,5</sup>, Robert Loechel<sup>6</sup>, Petra Hug<sup>2,5</sup>,  
3 Vidhya Jagannathan<sup>2,5</sup>, Jan Henkel<sup>2,5</sup>, Petra Roosje<sup>5,7</sup>, Marjo K. Hytönen<sup>8,9,10</sup>, Hannes Lohi<sup>8,9,10</sup>,  
4 Meharji Arumilli<sup>8,9,10</sup>, DoGA consortium, Katie M. Minor<sup>11</sup>, James R. Mickelson<sup>11</sup>, Cord  
5 Drögemüller<sup>2,5</sup>, Gregory S. Barsh<sup>&3,4</sup>, Tosso Leeb<sup>&2,5</sup>.

6 <sup>1</sup>Department of Population Health and Reproduction, School of Veterinary Medicine, University  
7 of California Davis, Davis, CA 95616 USA.

8 <sup>2</sup>Institute of Genetics, Vetsuisse Faculty, University of Bern, 3001, Bern, Switzerland.

9 <sup>3</sup>HudsonAlpha Institute for Biotechnology, Huntsville, AL, USA.

10 <sup>4</sup>Department of Genetics, Stanford University, Stanford, CA, USA.

11 <sup>5</sup>Dermfocus, University of Bern, 3001 Bern, Switzerland.

12 <sup>6</sup>VetGen, Ann Arbor, MI, 48108, USA.

13 <sup>7</sup>Division of Clinical Dermatology, Department of Clinical Veterinary Medicine, Vetsuisse  
14 Faculty, University of Bern, 3001 Bern, Switzerland.

15 <sup>8</sup>Department of Veterinary Biosciences, University of Helsinki, 00014 Helsinki, Finland.

16 <sup>9</sup>Department of Medical and Clinical Genetics, University of Helsinki, 00014 Helsinki, Finland.

17 <sup>10</sup>Folkhälsan Research Center, 00290 Helsinki, Finland.

18 <sup>11</sup>Department of Veterinary and Biomedical Sciences, University of Minnesota, Saint Paul, MN  
19 55108, USA.

20 \*, & These authors contributed equally to this work

21

22 **Distinctive color patterns in dogs are an integral component of canine diversity. Color**  
23 **pattern differences are thought to have arisen from mutation and artificial selection during**

24 **and after domestication from wolves** <sup>1,2</sup> **but important gaps remain in understanding how**  
25 **these patterns evolved and are genetically controlled** <sup>3,4</sup>. **In other mammals, variation at the**  
26 ***ASIP* gene controls both the temporal and spatial distribution of yellow and black pigments**  
27 **<sup>3,5-7</sup>. Here we identify independent regulatory modules for ventral and hair cycle *ASIP***  
28 **expression, and we characterize their action and evolutionary origin. Structural variants**  
29 **define multiple alleles for each regulatory module and are combined in different ways to**  
30 **explain five distinctive dog color patterns. Phylogenetic analysis reveals that the haplotype**  
31 **combination for one of these patterns is shared with arctic white wolves and that its hair**  
32 **cycle-specific module likely originated from an extinct canid that diverged from grey**  
33 **wolves more than 2 million years before present. Natural selection for a lighter coat during**  
34 **the Pleistocene provided the genetic framework for widespread color variation in dogs and**  
35 **wolves.**

36  
37 A central aspect of the amazing morphologic diversity among domestic dogs are their  
38 colors and color patterns. In many mammals, specific color patterns arise through differential  
39 regulation of *Agouti* (*ASIP*), which encodes a paracrine signaling molecule that causes hair  
40 follicle melanocytes to switch from making eumelanin (black or brown pigment) to pheomelanin  
41 (yellow to nearly white pigment) <sup>8</sup>. In laboratory mice, *Asip* expression is controlled by  
42 alternative promoters in specific body regions, and at specific times during hair growth, and  
43 gives rise to the light-bellied agouti phenotype, with ventral hair that is yellow and dorsal hair  
44 that contains a mixture of black and yellow pigment <sup>7</sup>. Genetic variation in *ASIP* affects color  
45 pattern in many mammals; however, in dogs, the situation is still unresolved, in large part due to  
46 the complexity of different pattern types, and challenges in distinguishing whether genetic  
47 association of one or more variants represents causal variation or close linkage <sup>4</sup>. Here we

48 investigate non-coding variation in *ASIP* regulatory modules and their effect on patterning  
49 phenotypes in domestic dogs. We expand our analysis to include modern and ancient wild canids  
50 and uncover an evolutionary history in which natural selection during the Pleistocene provided a  
51 molecular substrate for color pattern diversity today.

52 Expression of *ASIP* promotes pheomelanin synthesis, therefore *ASIP* alleles associated  
53 with a yellow color are dominant to those associated with a black color. Although dominant  
54 yellow (DY) is common in dogs from diverse geographic locations, the most common coat  
55 pattern of modern wolves is agouti (AG)<sup>9</sup>, in which the dorsum has banded hairs and the  
56 ventrum is light. Three additional color patterns are recognizable, but all have been described  
57 historically by different, inconsistent and sometimes overlapping names that predate genomic  
58 analysis (Supplementary Table 1); we refer to these as shaded yellow (SY), black saddle (BS),  
59 and black back (BB) (Fig. 1).

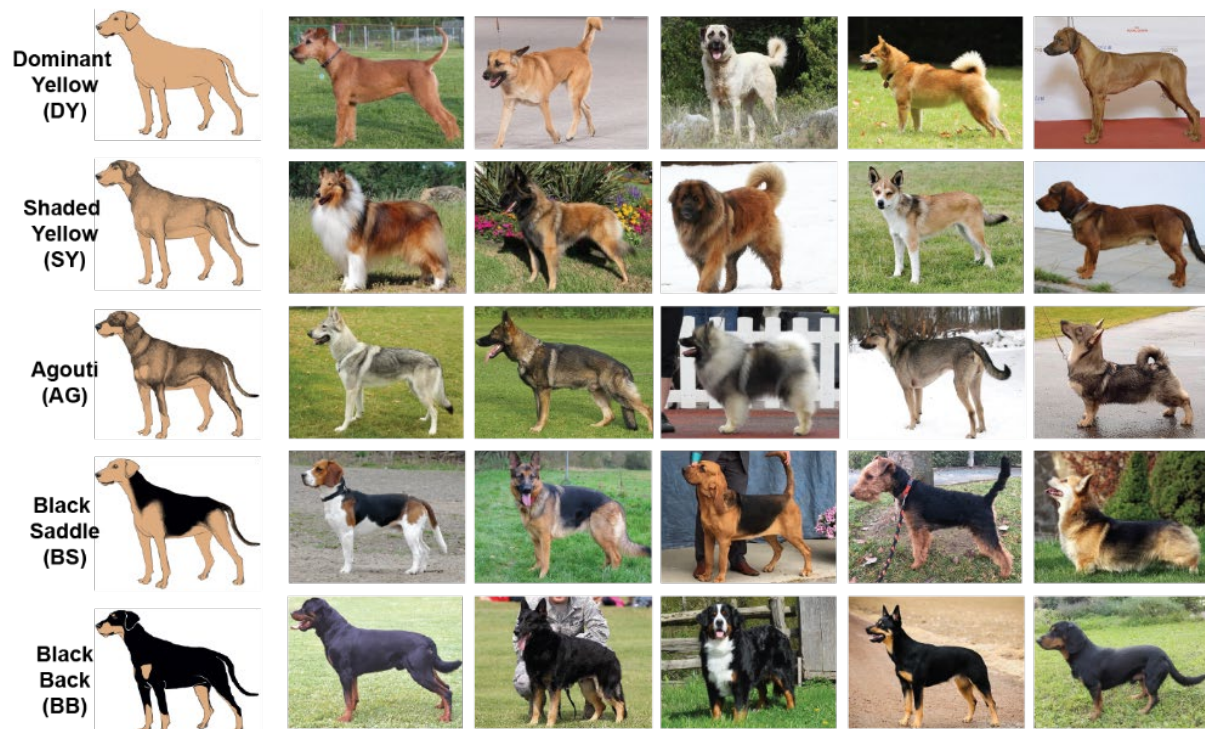

61 **Fig. 1: Coat patterns controlled by the *ASIP* locus.** The five phenotype names proposed here  
62 are shown on the left. To the right are photographs of representative dogs of various  
63 morphological types. Length and curl of hair coat, shade of pheomelanin (red to nearly white),  
64 presence of a black facial mask and white spotting are the result of genetic variation at other loci.  
65 Patterns are displayed in order of dominance. A completely black coat caused by *ASIP* loss-of-  
66 function (recessive black) is not shown.

67  
68 We collected skin RNA-seq data from dogs with different pattern phenotypes and  
69 identified three alternative untranslated first exons for dog *ASIP* (Fig. 2a, Supplementary Table  
70 2). As described below, two of the three corresponding promoters exhibit different levels of  
71 activity and characteristic non-coding sequence variation according to dog pattern phenotype.  
72 These two promoters are orthologous to the ventral promoter (VP) and hair cycle promoter  
73 (HCP) in the laboratory mouse<sup>7</sup>; however, our genetic analyses (Fig. 2) reveal that the dog VP  
74 and HCP exhibit greater regional and quantitative variation than their mouse counterparts.

75 To better understand the relationship between promoter usage and pattern phenotypes, we  
76 inspected whole genome sequence data from 77 dog and wolf samples with known color patterns  
77 (Supplementary Table 3). We identified multiple structural variants that lie within 2 kb of the VP  
78 or HCP transcriptional start sites, confirmed their presence and identity by Sanger sequencing,  
79 and used homozygous individuals to infer two VP haplotypes and five HCP haplotypes. VP1  
80 contains an upstream SINE element and an A-rich expansion not found in VP2 (Fig. 2a, left,  
81 Supplementary Table 1); the five HCP haplotypes differ according to the number and identity of  
82 upstream SINE elements, as well as additional insertions and deletions (Fig. 2a, right,  
83 Supplementary Table 1).

84           These results were extended by developing PCR-based genotyping assays for the VP and  
85 HCP structural variants, examining their association with different pattern phenotypes in 352  
86 dogs from 34 breeds, and comparing these results to previously published variants (Extended  
87 Data Fig. 2-3, Extended Data Table 1, Supplementary Tables 4-7). As depicted in Fig. 2b,  
88 combinations of VP1 or VP2 with HCP1, 2, 3, 4, or 5 are correlated perfectly with variation in  
89 *ASIP* pattern phenotype. Because the level of *ASIP* activity is directly related to the amount of  
90 yellow pigment production, these genetic association results suggest that VP1 has greater activity  
91 than VP2, HCP1 has greater activity than HCP2, and HCP3, 4, and 5 all represent loss-of-  
92 function; indeed, the HCP4 haplotype includes a large deletion that includes the hair cycle first  
93 exon (Fig. 2a). For example, homozygotes for VP1-HCP1, VP2-HCP1, VP2-HCP2 are dominant  
94 yellow, shaded yellow and agouti, respectively (Extended Data Table 1, Supplementary Tables  
95 4-7). Black saddle dogs are VP1-HCP4 homozygotes and most black back dogs are VP2-HCP3  
96 homozygotes (although all three loss of function HCP haplotypes paired with VP2 can produce  
97 the black back phenotype) (Extended Data Fig.3 and Supplementary Table 7). Increased activity  
98 from the ventral promoter (VP1 vs. VP2) correlates with dorsal expansion of yellow pigment in  
99 black saddle compared to black back phenotypes (Fig. 1, 2b), which indicates that the VP and  
100 HCP haplotypes function separately from each other.

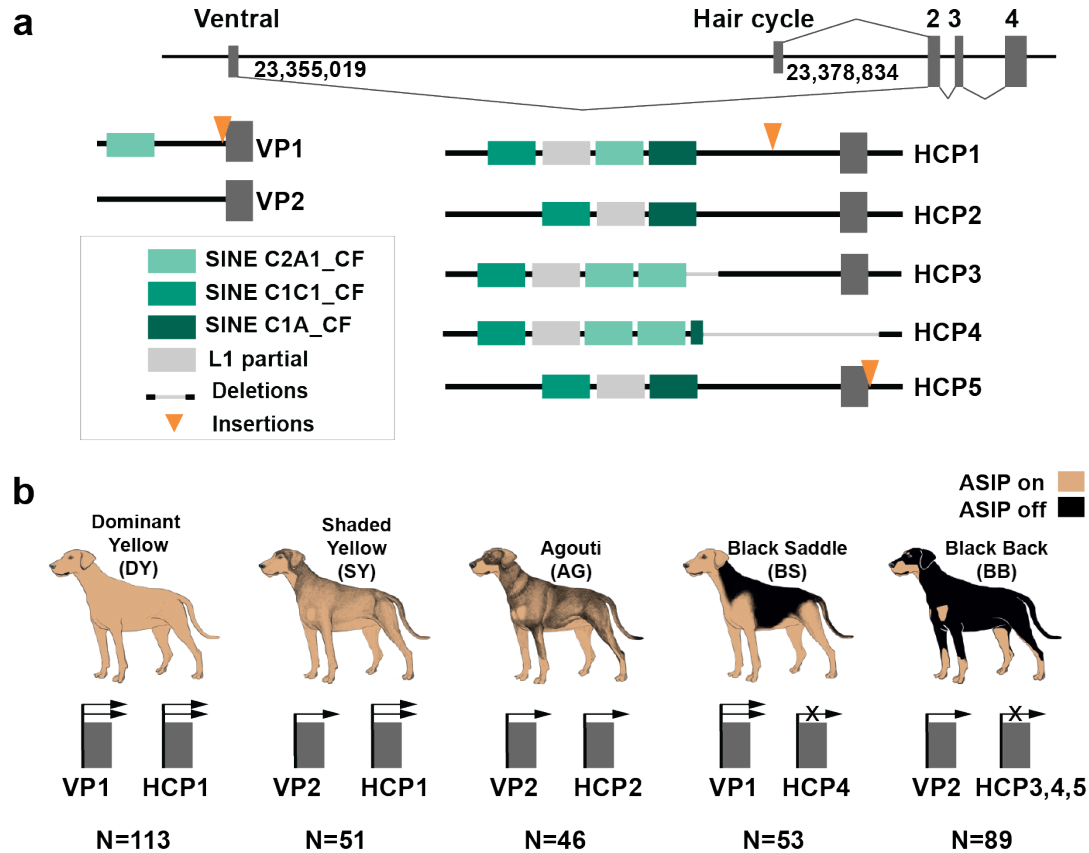

101

102 **Fig. 2: Structural variation at the *ASIP* locus in domestic dogs with different color patterns**

103 (a) Schematic of the two relevant alternative transcription start sites and first exons (nucleotide  
 104 coordinates denote their 3'-ends), together with the haplotypes observed. (b) Summary of how  
 105 extended haplotype combinations are related to color pattern phenotypes. Semi-quantitative  
 106 expression levels are depicted with one or two arrows or an X for no expression (Extended Data  
 107 Fig. 1). N is the number of dogs for which the VP and HCP haplotype combinations accounted  
 108 for *ASIP* pattern phenotype. An additional 14 dogs had a dark mask (due to an *MC1R* variant)  
 109 which prevented accurate assignment of *ASIP* pattern phenotype (Extended Data Table 1,  
 110 Supplementary Tables 4-7).

111

112           The relationship between VP and HCP variants and *ASIP* transcriptional activity was  
113 explored further using biopsies of dorsal and ventral skin (Supplementary Table 8, Extended  
114 Data Fig. 1). Read counts from RNA-seq data were consistent with expectations from the genetic  
115 association results: VP1 has greater transcriptional activity and is spatially broadened relative to  
116 VP2 (which is only expressed ventrally), HCP1 has greater transcriptional activity relative to  
117 HCP2, and no reads are detected from HCP3 or HCP4 (Fig. 2B, Extended Data Fig. 1). Taken  
118 together, these results provide a molecular explanation for *ASIP* pattern variation in dogs in  
119 which the VP and HCP haplotypes function as independent regulatory modules for their  
120 associated promoters and first exons.

121           Genetic relationships between variant *ASIP* regulatory modules were examined by  
122 comparing haplotypes in 18 homozygous dogs to those from 10 contemporary grey wolves (Fig.  
123 3a, Supplementary Table 9). Overall, agouti dog haplotypes were similar to those from grey  
124 wolves. However, dominant yellow and, to a lesser extent, shaded yellow dog haplotypes were  
125 similar to those from arctic grey wolves from Ellesmere Island and Greenland, where all wolves  
126 are white (Fig. 3a, 3c). Notably, white coat color in wolves represents pale pheomelanin, as in  
127 Kermode bears or snowshoe hares<sup>10,11</sup>. In the 64 kb segment that contains the VP, HCP, and  
128 coding sequence, the arctic grey wolf haplotypes are identical except for one polymorphic site,  
129 and are distinguished from dog dominant yellow haplotypes by only 6 SNVs (Extended Data  
130 Table 2). Taken together, these observations suggest a common origin of dominant yellow in  
131 dogs and white coat color in wolves without recent genetic exchange.

132

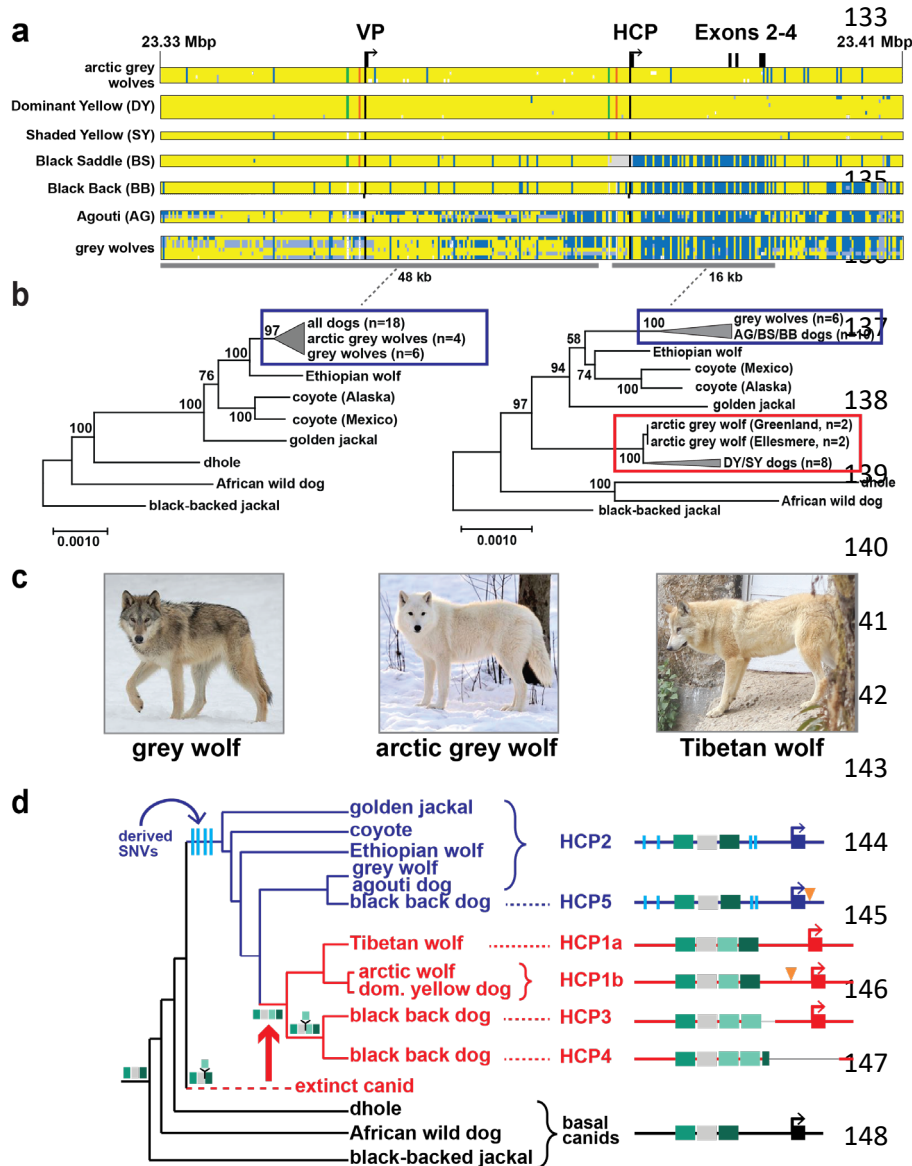

**Fig. 3: Yellow dogs and white wolves share an ancient HCP haplotype. (a)**

Genotypes at 377 SNVs (columns) at the *ASIP* locus in grey wolves and dogs (rows), coded for heterozygosity (light blue), homozygosity for the reference (yellow) or the alternate (dark blue) allele, or as missing genotypes (white). Alternate first exons

(arrows) and nearby DY-associated structural variants (SINE insertions: green, polynucleotide expansions: orange) are included for reference. (b) Maximum likelihood phylogenies, including seven extant canid species and the dog, from 48 and 16 kb intervals upstream or downstream of the HCP, respectively. Grey wolf/dog phyletic clades are highlighted with boxes to indicate relationships that are consistent (blue) or inconsistent (red) with genome-wide phylogenies. (c) Images of a grey wolf, arctic grey wolf, Tibetan wolf. (d) A phylogeny representing distinct HCP evolutionary histories inferred from genetic variation in extant canids. Structural variants (as



156 represented in Fig. 2) and derived SNVs (cyan) distinguish wolf-like canid (blue), ghost lineage  
157 (red), and basal canid (black) haplotypes.

158         The evolutionary origin of *ASIP* haplotypes was explored further by constructing  
159 maximum likelihood phylogenetic trees for dogs, wolves, and 8 additional canid species  
160 (Supplementary Table 9). Based on differences in SNV frequency, the 48 kb VP segment was  
161 considered separately from the 16 kb HCP-exon 2/3/4 segment (see supplementary text, Fig. 3a).  
162 In the VP tree, all dogs and grey wolves form a single clade, consistent with known species  
163 relationships<sup>12</sup>. However, in the HCP tree, the dominant yellow and shaded yellow dogs lie in a  
164 separate clade together with arctic grey wolves; remarkably, this clade is basal to the golden  
165 jackal and distinct from other canid species (Fig. 3b, Extended Data Fig. 4, 5).

166         The pattern of derived allele sharing provides additional insight (Fig. 3d and Extended  
167 Data Fig. 6). As depicted in Fig. 2b and 3d, HCP2 is characterized by three small repeat elements  
168 that are shared by all canids and is therefore the ancestral form. In the branch leading to core  
169 wolf-like canids (golden jackal, coyote, Ethiopian wolf, and grey wolf), there are nine derived  
170 SNV alleles within the HCP2-exon 2/3/4 segment (Extended Data Fig. 6), four of which flank  
171 the repeat elements close to HCP2 (Fig. 3d). None of the nine derived alleles are present in the  
172 dominant yellow HCP1-exon 2/3/4 segment haplotype (which also carries an additional SINE  
173 close to HCP1; therefore this haplotype must have originated prior to the last common ancestor  
174 of golden jackals and other wolf-like canids >2 Mybp<sup>13</sup>. Although the 16 kb HCP1-exon 2/3/4  
175 segment haplotype could have originated on a branch leading to the core wolf-like canids, it  
176 would have had to persist via incomplete lineage sorting and absence of recombination for more  
177 than 2 million years and through three speciation events (supplementary text). A more likely  
178 scenario is that HCP1 represents a ghost lineage from an extinct canid (Fig. 3d, 4b) that was

179 introduced by hybridization with grey wolves during the Pleistocene (see below), as has been  
180 suggested for an ancestor of the grey wolf and coyote<sup>12</sup>, and in high altitude Tibetan and  
181 Himalayan wolves<sup>14</sup>.

182 We expanded our analysis of VP and HCP haplotypes to a total of 45 North American  
183 and 23 Eurasian wolves, and identified a variant HCP1 haplotype in Tibetan wolves that does not  
184 extend to exon 2/3/4 and lacks the 24 bp insertion found in arctic grey wolves and dominant  
185 yellow dogs (Supplementary Table 10). The Tibetan and arctic grey wolf haplotypes are referred  
186 to as HCP1a and HCP1b, respectively (Fig. 3d, Extended Data Fig. 7, 8). The VP1-HCP1b  
187 haplotype combination is found mostly in the North American Arctic in a distribution parallel to  
188 that of white coat color (Extended Data Fig. 7a)<sup>15</sup>. This haplotype combination is not observed  
189 in Eurasia, although one similar to shaded yellow, VP2-HCP1a, was observed in seven light-  
190 colored wolves from Tibet or Inner Mongolia (Fig. 3d, Extended Data Fig. 7b)<sup>16</sup>.

191 Additional insight into the demographic history of these haplotypes emerges from  
192 analysis of ancient dog (n=5) and grey wolf (n=2) WGS data, dated 4,000 – 35,000 ybp  
193 (Supplementary text and Supplementary Table 10), in which both forms of the VP (VP1 and  
194 VP2), and four forms of the HCP (HCP1a, HCP1b, HCP2, HCP4) were observed in various  
195 combinations (Fig. 4a, Extended Data Fig. 8). Ancient wolves from the Lake Taimyr and Yana  
196 River areas of Arctic Siberia had at least one HCP1 haplotype, while ancient dogs from central  
197 Europe, Ireland, and Siberia carried HCP1a, HCP1b, and HCP4, respectively (Supplementary  
198 Table 10). Thus, diversity in *ASIP* regulatory sequences responsible for color variation today was  
199 apparent by 35,000 ybp in ancient wolves and by 9,500 ybp in ancient dogs.

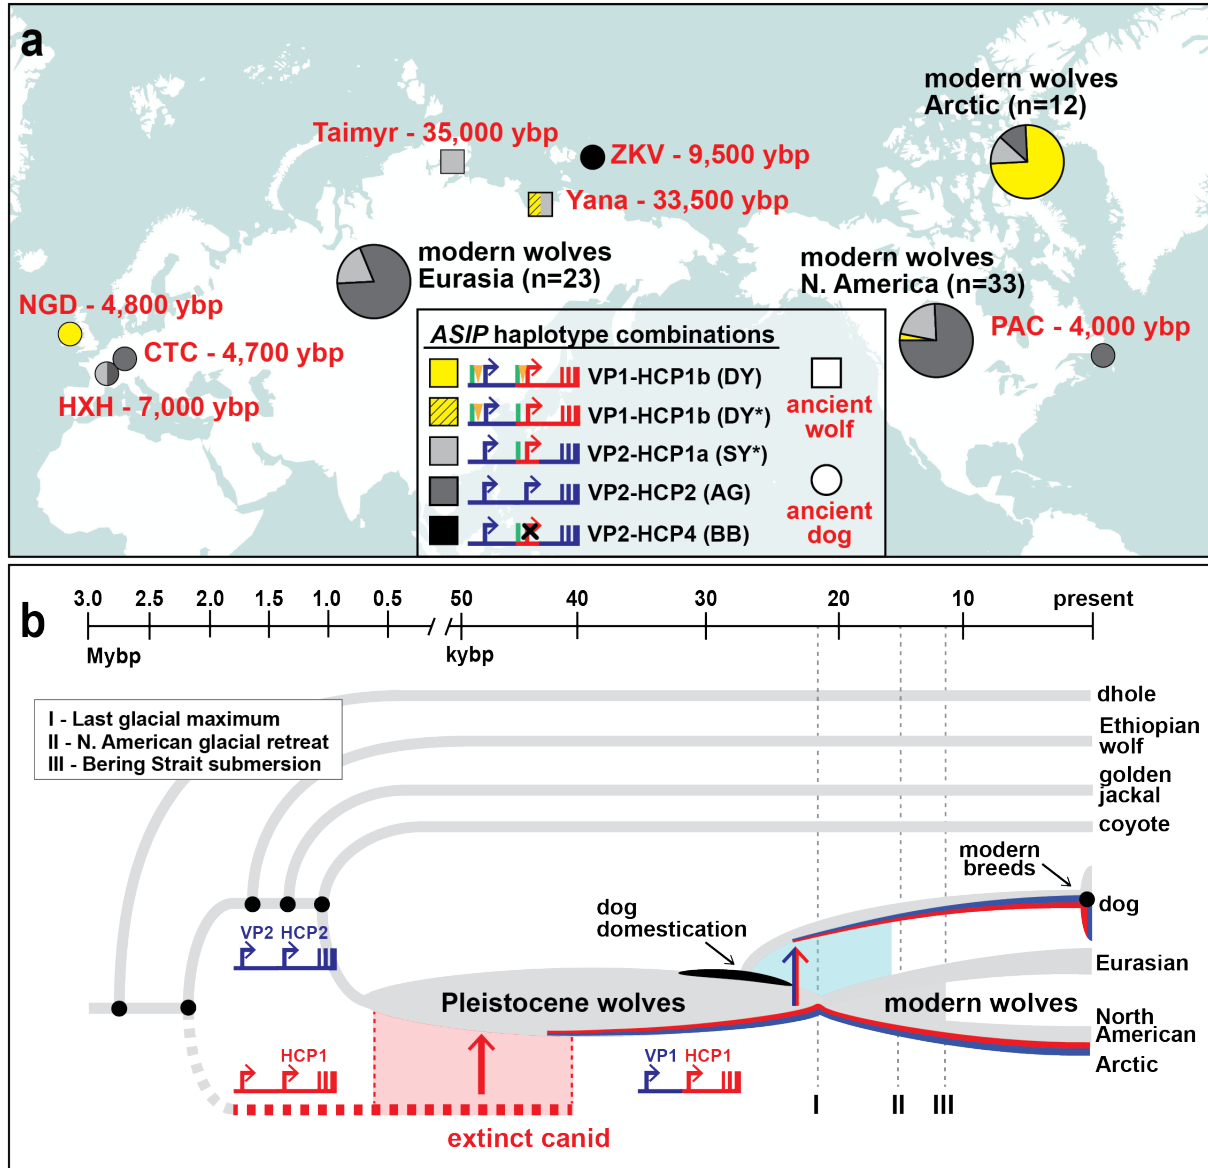

200

201 **Fig. 4: Distribution of *ASIP* alleles in ancient dogs and wolves, and an evolutionary model**

202 **for dominant yellow acquisition. (a) *ASIP* haplotypes were inferred from whole genome**

203 **sequencing of 5 ancient dog (circles), 2 ancient wolves (squares), and 68 modern wolves (pie**

204 **charts) distributed across the Holarctic (see Supplementary Table 10 and Extended Data Fig. 8**

205 **for detailed haplotype representations). Asterisks indicate SY/DY haplotypes for which the**

206 **HCP1 insertion is either absent (SY\*) or not ascertainable (DY\*).** (b) A model for origin of the

207 **dominant yellow haplotype and its transmission into dogs and arctic wolves, in which molecular**

208 alterations at modular promoters were acquired by introgression (red, HCP1) or by mutation in  
209 the grey wolf (blue, VP1). The timeline for speciation events, dog domestication, and geological  
210 events affecting grey wolf dispersal are based on prior studies<sup>13,17</sup>.

211 Together with our phylogenetic results, comparative analysis of wolf and dog *ASIP*  
212 haplotypes suggests an evolutionary history in which multiple derivative haplotypes and  
213 associated color patterns arose by recombination and mutation from two ancestral configurations  
214 corresponding to a white wolf (VP1-HCP1) and a grey wolf (VP2-HCP2), both present in the  
215 late Pleistocene (Fig. 4a, Extended Data Fig. 8). The distribution of derivative haplotypes  
216 explains color pattern diversity not only in dogs but also in modern wolf populations across the  
217 Holarctic, including white wolves in the North American Arctic (VP1- HCP1b) and yellow  
218 wolves in the Tibetan highlands (VP2-HCP1a), and is consistent with natural selection for light  
219 coat color.

220 A likely timeline for the origin of modules driving high levels of *ASIP* expression is  
221 depicted in Fig. 4b and indicates a dual origin. The HCP1 haplotype represents introgression into  
222 Pleistocene grey wolves from an extinct canid lineage that diverged from grey wolves more than  
223 2 Mybp. This introgression as well as the mutation from VP2 to VP1 occurred prior to 33,500  
224 ybp, based on direct observation from an ancient wolf sample (Fig. 4a). Natural selection for  
225 VP1 and HCP1 are a likely consequence of Pleistocene adaptation to arctic environments and  
226 genetic exchange in glacial refugia, driven by canid and megafaunal dispersal during interglacial  
227 periods. Modern grey wolves are thought to have arisen from a single source ~25,000 ybp close  
228 to the last glacial maximum<sup>18,19</sup>; during the North American glacial retreat that followed, the  
229 VP1-HCP1b haplotype combination was selected for in today's white-colored arctic wolves.

230 In dogs, ASIP color pattern diversification was likely an early event during  
231 domestication, since our analysis of ancient DNA data reveals several different VP and HCP  
232 haplotypes in Eurasia by 4,800 ybp. This is consistent with the wide distribution of dominant  
233 yellow across modern dog breeds from diverse locations, as well as the dingo (Supplementary  
234 Table 9), a feral domesticate introduced to Australia at least 3,500 ybp<sup>20</sup>. Of particular interest is  
235 the Zhokov island dog from Siberia<sup>21,22</sup>. Based on a haplotype combination of VP2-HCP4, this  
236 sled dog that lived 9,500 years ago exhibited a black back color pattern, allowing it to be easily  
237 distinguished from white colored wolves in an arctic environment. Our results show how  
238 introgression, demographic history, and the genetic legacy of extinct canids played key roles in  
239 shaping this diversity.

## 240 **References**

- 241 1 Linderholm, A. & Larson, G. The role of humans in facilitating and sustaining coat  
242 colour variation in domestic animals. *Semin Cell Dev Biol* **24**, 587-593,  
243 doi:10.1016/j.semcdb.2013.03.015 (2013).
- 244 2 Wayne, R. K. & vonHoldt, B. M. Evolutionary genomics of dog domestication. *Mamm*  
245 *Genome* **23**, 3-18, doi:10.1007/s00335-011-9386-7 (2012).
- 246 3 Caro, T. & Mallarino, R. Coloration in Mammals. *Trends Ecol Evol* **35**, 357-366,  
247 doi:10.1016/j.tree.2019.12.008 (2020).
- 248 4 Dreger, D. L. *et al.* Atypical Genotypes for Canine Agouti Signaling Protein Suggest  
249 Novel Chromosomal Rearrangement. *Genes (Basel)* **11**, doi:10.3390/genes11070739 (2020).
- 250 5 Henkel, J. *et al.* Selection signatures in goats reveal copy number variants underlying  
251 breed-defining coat color phenotypes. *PLoS Genet* **15**, e1008536,  
252 doi:10.1371/journal.pgen.1008536 (2019).

- 253 6 Linnen, C. R. *et al.* Adaptive evolution of multiple traits through multiple mutations at a  
254 single gene. *Science* **339**, 1312-1316, doi:10.1126/science.1233213 (2013).
- 255 7 Vrieling, H., Duhl, D. M., Millar, S. E., Miller, K. A. & Barsh, G. S. Differences in  
256 dorsal and ventral pigmentation result from regional expression of the mouse agouti gene. *Proc*  
257 *Natl Acad Sci U S A* **91**, 5667-5671, doi:10.1073/pnas.91.12.5667 (1994).
- 258 8 Barsh, G., Gunn, T., He, L., Schlossman, S. & Duke-Cohan, J. Biochemical and genetic  
259 studies of pigment-type switching. *Pigment Cell Res* **13 Suppl 8**, 48-53, doi:10.1034/j.1600-  
260 0749.13.s8.10.x (2000).
- 261 9 Kaelin, C. B. & Barsh, G. S. Genetics of pigmentation in dogs and cats. *Annu Rev Anim*  
262 *Biosci* **1**, 125-156, doi:10.1146/annurev-animal-031412-103659 (2013).
- 263 10 Ritland, K., Newton, C. & Marshall, H. D. Inheritance and population structure of the  
264 white-phased "Kermode" black bear. *Curr Biol* **11**, 1468-1472, doi:10.1016/s0960-  
265 9822(01)00448-1 (2001).
- 266 11 Jones, M. R. *et al.* Adaptive introgression underlies polymorphic seasonal camouflage in  
267 snowshoe hares. *Science* **360**, 1355-1358, doi:10.1126/science.aar5273 (2018).
- 268 12 Gopalakrishnan, S. *et al.* Interspecific Gene Flow Shaped the Evolution of the Genus  
269 *Canis*. *Curr Biol* **28**, 3441-3449.e3445, doi:10.1016/j.cub.2018.08.041 (2018).
- 270 13 Koepfli, K. P. *et al.* Genome-wide Evidence Reveals that African and Eurasian Golden  
271 Jackals Are Distinct Species. *Curr Biol* **25**, 2158-2165, doi:10.1016/j.cub.2015.06.060 (2015).
- 272 14 Wang, M. S. *et al.* Ancient hybridization with an unknown population facilitated high  
273 altitude adaptation of canids. *Mol Biol Evol*, doi:10.1093/molbev/msaa113 (2020).

- 274 15 Gipson PS, E. E. B., Theodore N. Bailey, Diane K. Boyd, H. Dean Cluff, Douglas W.  
275 Smith and Michael D. Jiminez Color Patterns among Wolves in Western North America.  
276 *Wildlife Sociaty Bulletin* **30**, 821-830 (2002).
- 277 16 Zhang, W. *et al.* Hypoxia adaptations in the grey wolf (*Canis lupus chanco*) from  
278 Qinghai-Tibet Plateau. *PLoS Genet* **10**, e1004466, doi:10.1371/journal.pgen.1004466 (2014).
- 279 17 Freedman, A. H. & Wayne, R. K. Deciphering the Origin of Dogs: From Fossils to  
280 Genomes. *Annu Rev Anim Biosci* **5**, 281-307, doi:10.1146/annurev-animal-022114-110937  
281 (2017).
- 282 18 Fan, Z. *et al.* Worldwide patterns of genomic variation and admixture in gray wolves.  
283 *Genome Res* **26**, 163-173, doi:10.1101/gr.197517.115 (2016).
- 284 19 Loog, L. *et al.* Ancient DNA suggests modern wolves trace their origin to a Late  
285 Pleistocene expansion from Beringia. *Mol Ecol*, doi:10.1111/mec.15329 (2019).
- 286 20 Balme, J., O'Connor, S. & Fallon, S. New dates on dingo bones from Madura Cave  
287 provide oldest firm evidence for arrival of the species in Australia. *Sci Rep* **8**, 9933,  
288 doi:10.1038/s41598-018-28324-x (2018).
- 289 21 Lee, E. J. *et al.* Ancient DNA analysis of the oldest canid species from the Siberian  
290 Arctic and genetic contribution to the domestic dog. *PLoS One* **10**, e0125759,  
291 doi:10.1371/journal.pone.0125759 (2015).
- 292 22 Sinding, M.-H. S. *et al.* Arctic-adapted dogs emerged at the Pleistocene–Holocene  
293 transition. *Science* **368**, 1495-1499, doi:10.1126/science.aaz8599 (2020).
- 294 23 Dreger, D. L., Parker, H. G., Ostrander, E. A. & Schmutz, S. M. Identification of a  
295 mutation that is associated with the saddle tan and black-and-tan phenotypes in Basset Hounds  
296 and Pembroke Welsh Corgis. *J Hered* **104**, 399-406, doi:10.1093/jhered/est012 (2013).

297 24 Dreger, D. L. & Schmutz, S. M. A SINE insertion causes the black-and-tan and saddle  
298 tan phenotypes in domestic dogs. *J Hered* **102 Suppl 1**, S11-18, doi:10.1093/jhered/esr042  
299 (2011).

300 25 Berryere, T. G., Kerns, J. A., Barsh, G. S. & Schmutz, S. M. Association of an Agouti  
301 allele with fawn or sable coat color in domestic dogs. *Mamm Genome* **16**, 262-272,  
302 doi:10.1007/s00335-004-2445-6 (2005).

303

#### 304 **Methods**

305 All data generated or analyzed during this study are included in this published article (and its  
306 supplementary information files).

#### 307 **Ethics Statement**

308 All animal experiments were done in accordance with the local regulations. Experiments  
309 were approved by the “Cantonal Committee For Animal Experiments” (Canton of Bern; permits  
310 48/13, 75/16 and 71/19).

#### 311 **Skin biopsies and total RNA extraction**

312 Skin biopsies were taken from three dogs (a black back Miniature Pinscher and a dominant  
313 yellow Border Terrier and Irish Terrier). Two 6 mm punch biopsies were taken from  
314 differentially pigmented body areas of each animal (dorsal and ventral). RNA samples from dogs  
315 represent asynchronous hair growth relative to the hair cycle. The biopsies were immediately put  
316 in RNAlater (Qiagen) for at least 24 h and then frozen at  $-20^{\circ}\text{C}$ . Prior to RNA extraction, the  
317 skin biopsies were homogenized mechanically with the TissueLyser II device from Qiagen. Total  
318 RNA was extracted from the homogenized tissue using the RNeasy Fibrous Tissue Mini Kit  
319 (Qiagen) according to the manufacturer’s instructions. RNA quality was assessed with a



320 FragmentAnalyzer (Agilent) and the concentration was measured using a Qubit Fluorometer  
321 (ThermoFisher Scientific).

### 322 **Whole transcriptome sequencing (RNA-seq)**

323 From each sample, 1 µg of high quality total RNA (RIN >9) was used for library  
324 preparation with the Illumina TruSeq Stranded mRNA kit. The libraries were pooled and  
325 sequenced on an S1 flow cell with 2x50 bp paired-end sequencing using an Illumina NovaSeq  
326 6000 instrument. On average, 31.5 million paired-end reads per sample were collected. One  
327 publicly available Beagle sample was used (SRX1884098). All reads that passed quality control  
328 were mapped to the CanFam3.1 reference genome assembly using STAR aligner (version 2.6.0c)  
329 <sup>26</sup>.

### 330 **Transcript coordinates**

331 The STAR-aligned bam files were visualized in the IGV browser <sup>27</sup>. Three different  
332 alternate untranslated first exons that appeared to splice to the coding exons of *ASIP* were  
333 defined based on the visualizations of the read alignments in IGV. These exact transcripts have  
334 not been documented in NCBI and Ensembl gene models. The visually curated gene models are  
335 given in Supplementary Table 2.

### 336 **Identification of genomic variants**

337 WGS data from 71 dogs and 6 wolves was used for variant discovery (Supplementary Table  
338 3). They included 15 agouti dogs and wolves, 25 black back dogs, 11 black saddle dogs, 14  
339 dominant yellow dogs and 11 shaded yellow dogs and one white wolf. The genomes were either  
340 publicly available or sequenced as part of related projects in our group <sup>28</sup>. SNVs and small indels  
341 were called as described <sup>28</sup>. The IGV software <sup>27</sup> was used for visual inspection of the promoter

342 regions based on the transcripts identified in the RNA sequencing data. Structural variants were  
343 identified and association with coat color phenotypes was verified by visual inspection in IGV.

#### 344 **DNA samples for Sanger sequencing and genotyping**

345 Samples for variant discovery included two dogs from each color phenotype and are  
346 designated in Supplementary Table 5 with asterisks. Samples from dogs listed in Supplementary  
347 Table 5 were used for genotyping. The coat color phenotype of all animals was assigned based  
348 on breed-specific coat color standards or photographs or owner reporting. Genomic DNA was  
349 isolated from EDTA blood samples using the Maxwell RSC Whole Blood DNA kit (Promega).

#### 350 **Sequencing of promoter regions**

351 Sanger sequencing of PCR amplicons was carried out to validate and characterize structural  
352 variants at the sequence level in the promoter regions. All primer sequences and polymerases  
353 used are listed in Supplementary Table 4. PCR products amplified using LA Taq polymerase  
354 (Takara) or Multiplex PCR Kit (Qiagen) were directly sequenced on an ABI 3730 capillary  
355 sequencer after treatment with exonuclease I and shrimp alkaline phosphatase. Sequence data  
356 were analyzed with Sequencher 5.1 (GeneCodes). Interspersed repeat insertions were classified  
357 with the RepeatMasker program<sup>29</sup>. Multiple copies of SINE elements from the same and  
358 different families were resolved this way. The CanFam3.1 reference genome assembly is derived  
359 from the Boxer Tasha, a dominant yellow dog, and represents a DY haplotype, VP1-HCP1, of  
360 the *ASIP* gene. Descriptions of the promoter variants and Genbank accession numbers for HCP2-  
361 5 are in Supplementary Table 1. The table lists the 7 combinations of VP and HCP regulatory  
362 modules observed in dogs. As HCP3, HCP4, and HCP5 all represent loss-of-function alleles that  
363 are functionally equivalent, the 7 listed combinations correspond to only 5 distinct phenotypes.

364

365 **Genotyping assays**

366 The previously reported SINE insertion<sup>24</sup> was genotyped by fragment size analysis on an  
367 ABI 3730 capillary sequencer and analyzed with the GeneMapper 4.0 software (Applied  
368 Biosystems). The previously reported *ASIP* coding variants<sup>25</sup> were genotyped by Sanger  
369 sequencing PCR products. The previously reported *RALY* intronic duplication<sup>23</sup> was genotyped  
370 by size differentiation of PCR products on a Fragment Analyzer (Agilent). Five PCR-assays  
371 (ventral promoter assays 1, 2; hair cycle promoter assays 1, 2, 3) are required to unambiguously  
372 determine the VP and HCP haplotypes. The other four primer pairs in the list were used to  
373 genotype previously published diagnostic markers<sup>23-25</sup> or for the amplification of the entire HCP  
374 (Supplementary Table 4). Genotyping results for all samples are shown in Supplementary Table  
375 5. There is a perfect genotype-phenotype association in 352 dogs (see Fig. 2). In the remaining  
376 14 dogs, the presence of a eumelanistic mask due to an epistatic *MC1R* allele prevented the  
377 reliable phenotypic differentiation of dominant yellow and shaded yellow dogs. Breeds and the  
378 different promoter haplotype combinations identified within each breed are indicated in  
379 Supplementary Table 6. In a few dogs that were heterozygous at both VP and HCP, the phasing  
380 of the VP and HCP haplotype combinations was performed based on haplotype frequency within  
381 the same breed as noted. A family of Chinooks were used to determine the segregation of  
382 extended haplotypes and the phenotypic equivalency of HCP3 and HCP5 (Extended Data Fig 3).  
383 Summary of genotyping results and exclusion of previously associated variants is shown in  
384 Supplementary Table 7. This table lists the genotype-phenotype association in aggregated form.  
385 The table also contains the genotypes for variants that were previously reported to be associated  
386 with pattern phenotypes<sup>23-25</sup>. Numbers in red indicate genotyping results, for which these  
387 markers yielded discordant results.

## 388 **Comparison of promoter haplotype effects on transcripts**

389 Transcript data was generated from a second set of samples. Sample descriptions and colors  
390 are shown in Supplementary Table 8 for all RNA experiments. Skin samples were collected from  
391 a male Swedish Elkhound (agouti), female German Pinscher (dominant yellow) and male  
392 Rottweiler (black back) after euthanasia that was conducted due to behavioral or health problems  
393 not related to skin. Samples were collected in RNAlater Stabilization Solution and stored at –  
394 80°C. RNA was extracted using the RNeasy Fibrous Tissue Mini Kit (Qiagen) according to  
395 manufacturer’s instructions. Integrity of RNA was evaluated with Agilent 2100 Bioanalyzer or  
396 TapeStation system (Agilent) and concentration measured with DeNovix DS-11  
397 Spectrophotometer (DeNovix Inc.). The libraries for STRT (Single cell reverse tagged) RNA-  
398 sequencing were prepared using STRT method with unique molecular identifiers <sup>30</sup> and  
399 modifications including longer UMI’s of 8 bp, addition of spike-in ERCC control RNA for  
400 normalization of expression, and Globin lock method <sup>31</sup> with LNA-primers for canine alpha- and  
401 betaglobin genes. The libraries were sequenced with an Illumina NextSeq 500. Reads were  
402 mapped to the CanFam3.1 genome build using HISAT1 mapper version 2.1.0 <sup>32</sup>.

403 The alignment-free quantification method Kallisto (version 0.46.0) <sup>33</sup> was used to estimate  
404 the abundance and quantified as transcripts per million mapped reads (TPM) data based on an  
405 index built from CanFam3.1 Ensembl transcriptome (release 99). The curated *ASIP* transcript  
406 isoform models based upon alignment visualizations in the IGV browser <sup>27</sup> were also included in  
407 the transcriptome. Results based on genotype of the promoter haplotypes are displayed in  
408 Extended Data Fig. 1 as TPM.

409

410

## 411 **Haplotype construction**

412 Haplotypes were constructed from two publicly available VCF files PRJEB32865 and  
413 PRJNA448733. The VCFs for selected dogs were merged using BCFtools merge tool  
414 (<http://samtools.github.io/bcftools/>) with the parameter --missing-to-ref, which assumed  
415 genotypes at missing sites are homozygous reference type 0/0. Only dogs homozygous for ASIP  
416 haplotypes were used to visualize haplotypes (Supplementary Table 3). SNVs that had 100% call  
417 rate in these samples were color coded and displayed relative to the genome assembly and  
418 previously commercialized variants (Extended Data Fig. 2).

## 419 ***ASIP* phylogenetic analysis in canids**

420 Illumina whole genome sequence for 36 canids, including seven extant species and the dog,  
421 were downloaded from the NCBI short read archive as aligned (bam format) or unaligned (fastq  
422 format reads (Supplementary Table 9). Fastq data were aligned to the dog genome (CanFam3.1)  
423 using BWA (v.0.7.17)<sup>34</sup> after trimming with Trim Galore (v.0.6.4). SNVs within a 110 kb  
424 interval (chr24:23,300,000-23,410,000), which includes the *ASIP* transcriptional unit and  
425 regulatory sequences, were identified with Platypus (v.0.8.1)<sup>35</sup> and filtered with VCFtools  
426 (v.0.1.15)<sup>36</sup> to include 2008 biallelic SNVs. Phasing was inferred with BEAGLE (v.4.1)<sup>37</sup>.

427 For phylogenetic analysis, the *ASIP* interval was partitioned in two regions, based on dog  
428 SNV density (Fig. 3a) and *ASIP* gene structure: a 48 kb region including the ventral first exon,  
429 extending to but excluding the hair cycle first exon (chr24:23,330,000-23,378,000), and a 16 kb  
430 region including the hair cycle first exon, extending to and including *ASIP* coding exons 2-4  
431 (chr24:23,378,001-23,394,000). Consensus sequences of equal length were constructed for each  
432 inferred canid haplotype using BCFtools (v.1.9). Phylogenies were inferred using Maximum  
433 Likelihood method and Tamura-Nei model with 250 bootstrap replications, implemented in

434 MEGAX<sup>38,39</sup>, and including 34 canids (Fig. 3b, Extended Data Fig. 4,5). For 34 of 36  
435 individuals, consensus haplotype pairs were adjacent to each other or, in the case of a few  
436 wolf/dog haplotypes, were positioned in neighboring branches with weak bootstrap support. The  
437 exceptions were the African golden wolf, a species derived by recent hybridization of the grey  
438 wolf and Ethiopian wolf<sup>12</sup>, and an eastern grey wolf from the Great Lakes region, which was  
439 also reported to have recent admixture with the coyote<sup>40</sup>. The African golden wolf and the  
440 eastern grey wolf were removed from the alignments, and a single haplotype for each individual  
441 was selected arbitrarily for tree building and display.

#### 442 **Haplotype analysis of *ASIP* locus in ancient dogs and wolves**

443 Whole genome sequencing data from several recent studies<sup>12,16,22,41-45</sup>, including five  
444 ancient dogs, two ancient grey wolves, and 68 modern grey wolves (Supplementary Table 10)  
445 were downloaded as aligned (bam format) or unaligned (fastq format) reads. Fastq data was  
446 aligned to the dog genome (canFam3.1) using BWA-MEM (v.0.7.17)<sup>34</sup>, after trimming  
447 with Trim Galore (v.0.6.4). Coverage depth for each sample ranged from 1-78x (Supplementary  
448 Table 10). Genotypes at five structural variants and six SNVs were determined by visual  
449 inspection using the IGV browser (Supplementary Table 10). Variants in or near the ventral  
450 promoter (n=2), the hair cycle promoter (n=6), and the coding exons (n=3) distinguished ventral  
451 and hair cycle promoter haplotypes (Supplementary Table 10, Extended Data Fig. 7). SNV  
452 genotypes were determined by allele counts; structural variants were genotyped by split reads at  
453 breakpoint junctions.

454 For 67 of 75 wolves (or ancient dogs), the phase of ventral and hair cycle promoter  
455 haplotypes was unambiguous. Seven wolves and one ancient dog were heterozygous with respect

456 to both the ventral and hair cycle promoter haplotypes, and for these samples, haplotype phase  
457 was inferred based on the linkage disequilibrium in the 67 unambiguous individuals.

## 458 **References**

- 459 26 Dobin, A. *et al.* STAR: ultrafast universal RNA-seq aligner. *Bioinformatics* **29**, 15-21,  
460 doi:10.1093/bioinformatics/bts635 (2013).
- 461 27 Robinson, J. T. *et al.* Integrative genomics viewer. *Nat Biotechnol* **29**, 24-26,  
462 doi:10.1038/nbt.1754 (2011).
- 463 28 Jagannathan, V., Drogemuller, C., Leeb, T. & Dog Biomedical Variant Database, C. A  
464 comprehensive biomedical variant catalogue based on whole genome sequences of 582 dogs and  
465 eight wolves. *Anim Genet* **50**, 695-704, doi:10.1111/age.12834 (2019).
- 466 29 RepeatMasker Open-4.0.  
467 (2013).
- 468 30 Islam, S. *et al.* Characterization of the single-cell transcriptional landscape by highly  
469 multiplex RNA-seq. *Genome Res* **21**, 1160-1167, doi:10.1101/gr.110882.110 (2011).
- 470 31 Krjutskov, K. *et al.* Globin mRNA reduction for whole-blood transcriptome sequencing.  
471 *Sci Rep* **6**, 31584, doi:10.1038/srep31584 (2016).
- 472 32 Pertea, M., Kim, D., Pertea, G. M., Leek, J. T. & Salzberg, S. L. Transcript-level  
473 expression analysis of RNA-seq experiments with HISAT, StringTie and Ballgown. *Nat Protoc*  
474 **11**, 1650-1667, doi:10.1038/nprot.2016.095 (2016).
- 475 33 Bray, N. L., Pimentel, H., Melsted, P. & Pachter, L. Near-optimal probabilistic RNA-seq  
476 quantification. *Nat Biotechnol* **34**, 525-527, doi:10.1038/nbt.3519 (2016).
- 477 34 Li, H. & Durbin, R. Fast and accurate short read alignment with Burrows-Wheeler  
478 transform. *Bioinformatics* **25**, 1754-1760, doi:10.1093/bioinformatics/btp324 (2009).

- 479 35 Rimmer, A. *et al.* Integrating mapping-, assembly- and haplotype-based approaches for  
480 calling variants in clinical sequencing applications. *Nat Genet* **46**, 912-918, doi:10.1038/ng.3036  
481 (2014).
- 482 36 Danecek, P. *et al.* The variant call format and VCFtools. *Bioinformatics* **27**, 2156-2158,  
483 doi:10.1093/bioinformatics/btr330 (2011).
- 484 37 Browning, S. R. & Browning, B. L. Rapid and accurate haplotype phasing and missing-  
485 data inference for whole-genome association studies by use of localized haplotype clustering. *Am*  
486 *J Hum Genet* **81**, 1084-1097, doi:10.1086/521987 (2007).
- 487 38 Kumar, S., Stecher, G., Li, M., Knyaz, C. & Tamura, K. MEGA X: Molecular  
488 Evolutionary Genetics Analysis across Computing Platforms. *Mol Biol Evol* **35**, 1547-1549,  
489 doi:10.1093/molbev/msy096 (2018).
- 490 39 Stecher, G., Tamura, K. & Kumar, S. Molecular Evolutionary Genetics Analysis  
491 (MEGA) for macOS. *Mol Biol Evol* **37**, 1237-1239, doi:10.1093/molbev/msz312 (2020).
- 492 40 vonHoldt, B. M. *et al.* A genome-wide perspective on the evolutionary history of  
493 enigmatic wolf-like canids. *Genome Res* **21**, 1294-1305, doi:10.1101/gr.116301.110 (2011).
- 494 41 Botigué, L. R. *et al.* Ancient European dog genomes reveal continuity since the Early  
495 Neolithic. *Nat Commun* **8**, 16082, doi:10.1038/ncomms16082 (2017).
- 496 42 Frantz, L. A. *et al.* Genomic and archaeological evidence suggest a dual origin of  
497 domestic dogs. *Science* **352**, 1228-1231, doi:10.1126/science.aaf3161 (2016).
- 498 43 Ni Leathlobhair, M. *et al.* The evolutionary history of dogs in the Americas. *Science* **361**,  
499 81-85, doi:10.1126/science.aao4776 (2018).



500 44 Skoglund, P., Ersmark, E., Palkopoulou, E. & Dalen, L. Ancient wolf genome reveals an  
501 early divergence of domestic dog ancestors and admixture into high-latitude breeds. *Curr Biol*  
502 **25**, 1515-1519, doi:10.1016/j.cub.2015.04.019 (2015).

503 45 vonHoldt, B. M. *et al.* Identification of recent hybridization between gray wolves and  
504 domesticated dogs by SNP genotyping. *Mamm Genome* **24**, 80-88, doi:10.1007/s00335-012-  
505 9432-0 (2013).

## 506 **Acknowledgements**

507 We would like to acknowledge the Next Generation Sequencing Platform of the University of  
508 Bern and Biomedicum Functional Genomics Unit (FuGU), University of Helsinki, for  
509 sequencing services and the Interfaculty Bioinformatics Unit of the University of Bern and IT  
510 Center For Science Ltd. (CSC, Finland) for providing high performance computing  
511 infrastructure. We thank resources and members of the Dog Genome Annotation (DoGA)  
512 Consortium (Hannes Lohi, Juha Kere, Carsten Daub, Marjo Hytönen, César L. Araujo, Ileana B.  
513 Quintero, Kaisa Kyöstiä, Maria Kaukonen, Meharji Arumilli, Milla Salonen, Riika Sarviaho,  
514 Julia Niskanen, Sruthi Hundi, Jenni Puurunen, Sini Sulkama, Sini Karjalainen, Antti Sukura,  
515 Pernilla Syrjä, Niina Airas, Henna Pekkarinen, Ilona Kareinen, Anna Knuuttila, Heli Nordgren,  
516 Karoliina Hagner, Tarja Pääkkönen, Kaarel Krjutskov, Sini Ezer, Shintaro Katayama, Masahito  
517 Yoshihara, Auli Saarinen, Abdul Kadir Mukarram, Matthias Hörtenhuber, Amitha Raman, Irene  
518 Stevens) as well as the Dog Biomedical Variant Database Consortium and all other canine  
519 researchers who deposited genome sequencing data into public databases. We thank the dog  
520 owners who provided photographs.

521

522

523 **Author Contributions**

524 DB: conceptualization, investigation, writing, visualization, formal analysis, CK: investigation,  
525 visualization, formal analysis, writing, AL, PH, RL: validation, resources, VJ and MR: software,  
526 PR, JH: validation, KM and JM: resources, MKH, AM, HL, DoGA consortium: resources, STRT  
527 analyses, CD: supervision and resources, GB: supervision, writing-review and editing, TL:  
528 conceptualization, funding acquisition, investigation, supervision, resources, writing-review and  
529 editing.

530 **Competing Interest Declaration**

531 Authors declare no competing interests except RL who is associated with a commercial  
532 laboratory that offers canine genetic testing.

533 **Additional Information**

534 Supplementary Information is available for this paper

535 Correspondence and requests for materials should be addressed to Danika L. Bannasch  
536 ([dlbannasch@ucdavis.edu](mailto:dlbannasch@ucdavis.edu))

537 Reprints and permissions information is available at [www.nature.com/reprints](http://www.nature.com/reprints)

538

539

540

541

542

543

544

545 **Extended data**

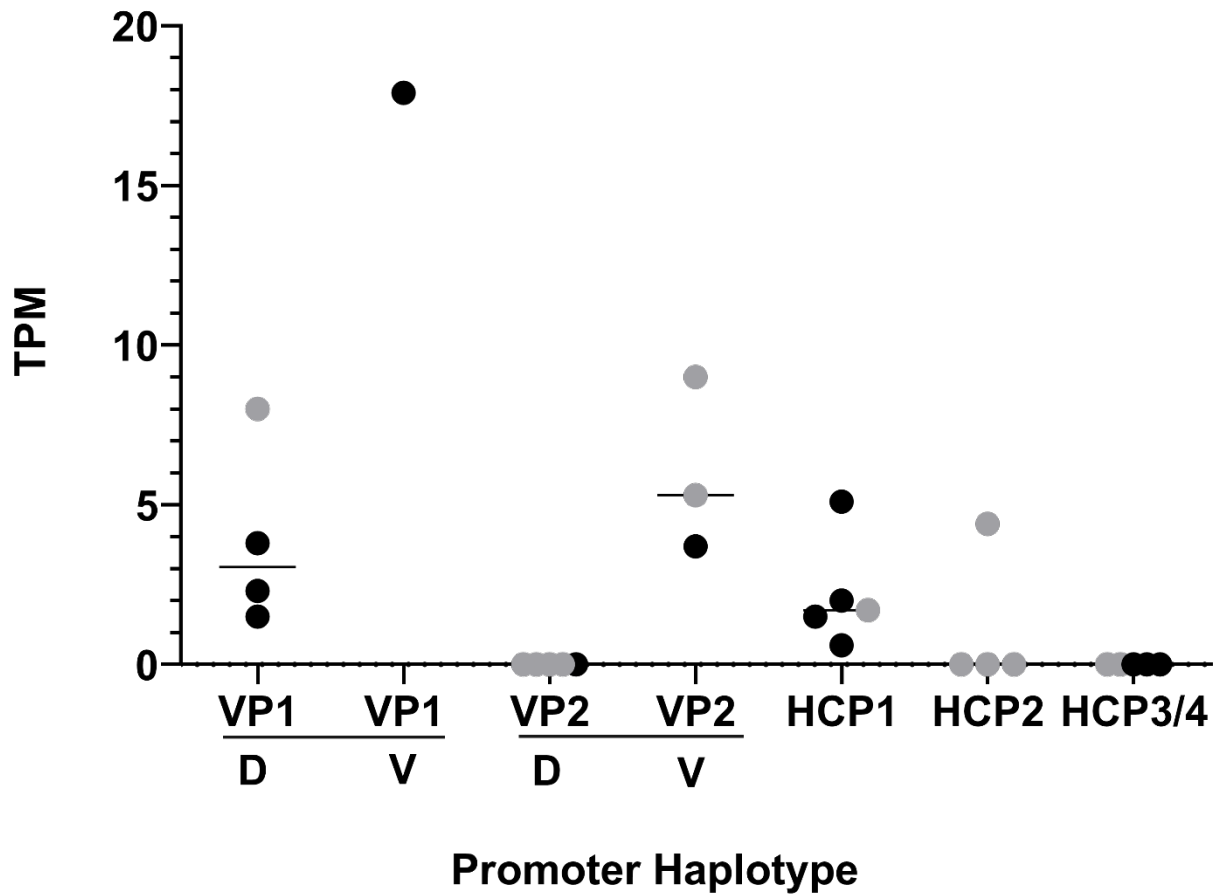

546

547 **Extended Data Fig. 1: Relative transcription of promoter variants.**

548 Black dots are from RNA-seq data and grey dots are from STRT RNA-seq data.

549 Dorsal samples (D) were taken from mid thorax of the dog and ventral (V) from the ventral

550 abdomen. The HCP samples were not synchronized with respect to the hair cycle.

551

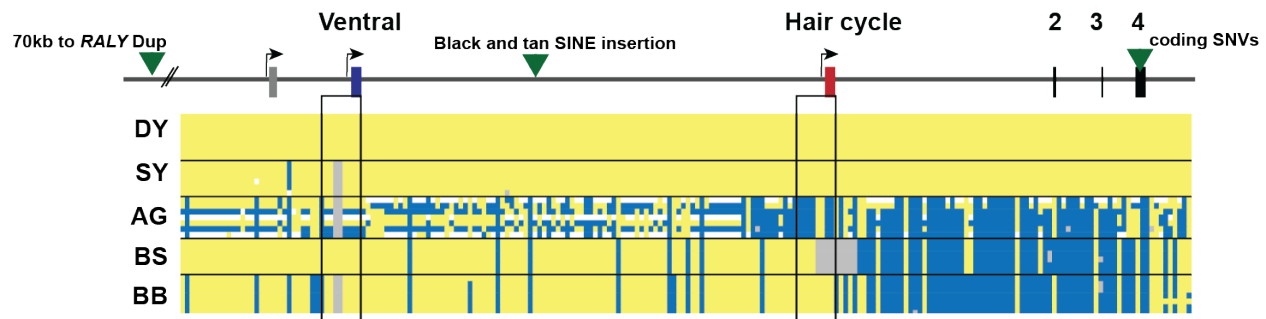

552

553 **Extended Data Fig. 2: Dog haplotypes across the *ASIP* locus with comparison to**

554 **commercial genetic tests for coat color.** Dog coat pattern phenotypes are listed on the left.

555 Alternative first exons are listed at the top. Yellow is a homozygous match to the genome

556 assembly, grey heterozygous, white deleted and blue homozygous alternate allele. The black

557 rectangles highlight the promoter regions. Green triangles represent the location of variants that

558 were previously used in commercial testing to distinguish different alleles for coat color patterns.

559 The previously identified intronic duplication that was promoted to commercially distinguish BS

560 and BB haplotypes in some breeds lies 70 kb to the left of this diagram <sup>23</sup>. The green triangle

561 between the VP and HCP is the location of the commercially tested SINE insertion for BB and

562 BS <sup>24</sup>. In the samples presented here, the dominant yellow haplotype extends through the coding

563 sequence where the missense variants associated with this haplotype were previously identified

564 <sup>25</sup>. In more primitive breeds, recombination events have disrupted this long linkage

565 disequilibrium between the promoter variants and the coding variants leading to incorrect genetic

566 test results with the existing tests. Samples used are listed in Supplementary Table 3. Raw

567 genotyping results are in Supplementary Table 5 and summary results comparing commercial

568 variants are in Supplementary Table 7.

569

570

571

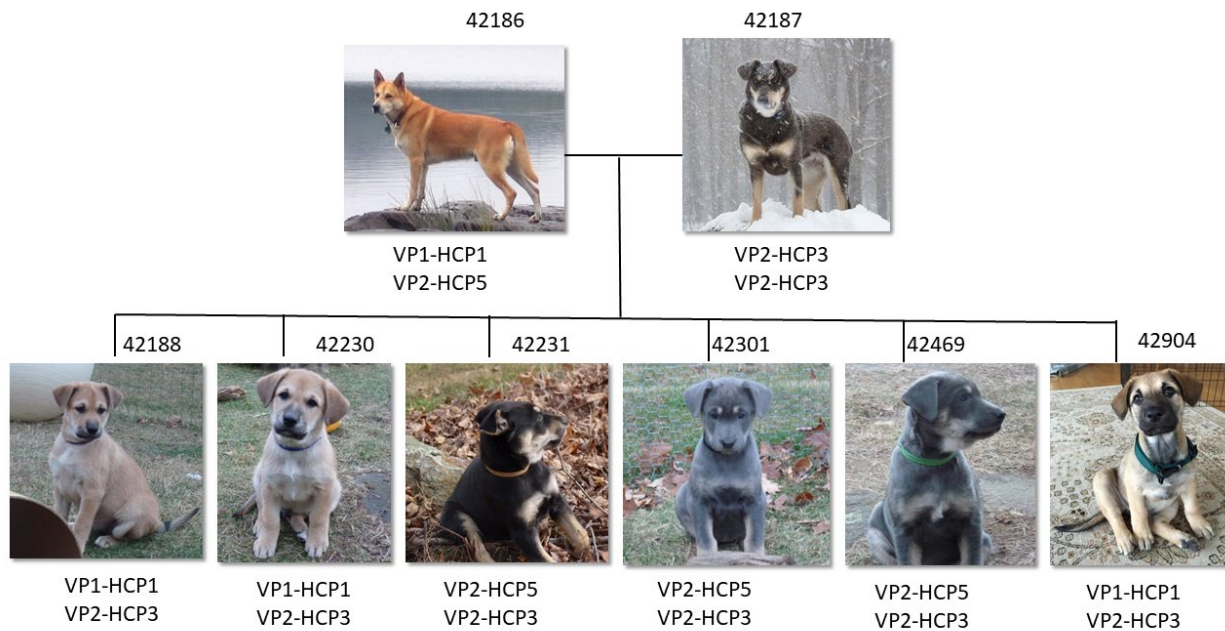

572

573 **Extended Data Fig. 3: A family of dogs segregating dominant yellow and black back.**

574 Extended haplotype combinations were determined in this family of Chinook dogs. In this breed

575 both HCP3 and HCP5 segregate and confer a black back phenotype combined with VP2.

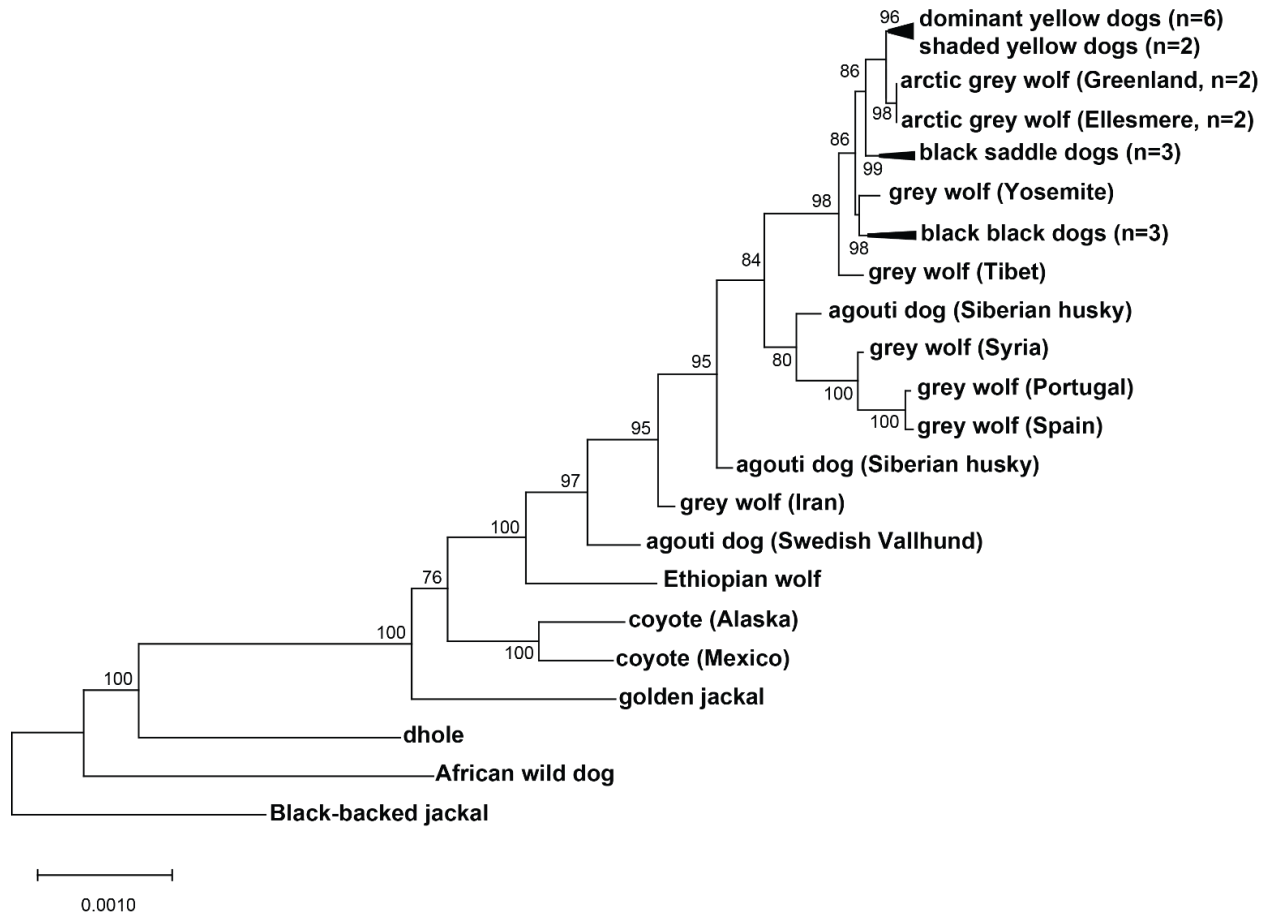

576

577 **Extended Data Fig. 4: Expanded canid phylogenetic tree inferred from 48 kb region**

578 **including the ventral promoter.** An expanded version of the maximum likelihood tree shown in

579 Fig. 3B, with 34 canids, representing 7 of 9 extant species.



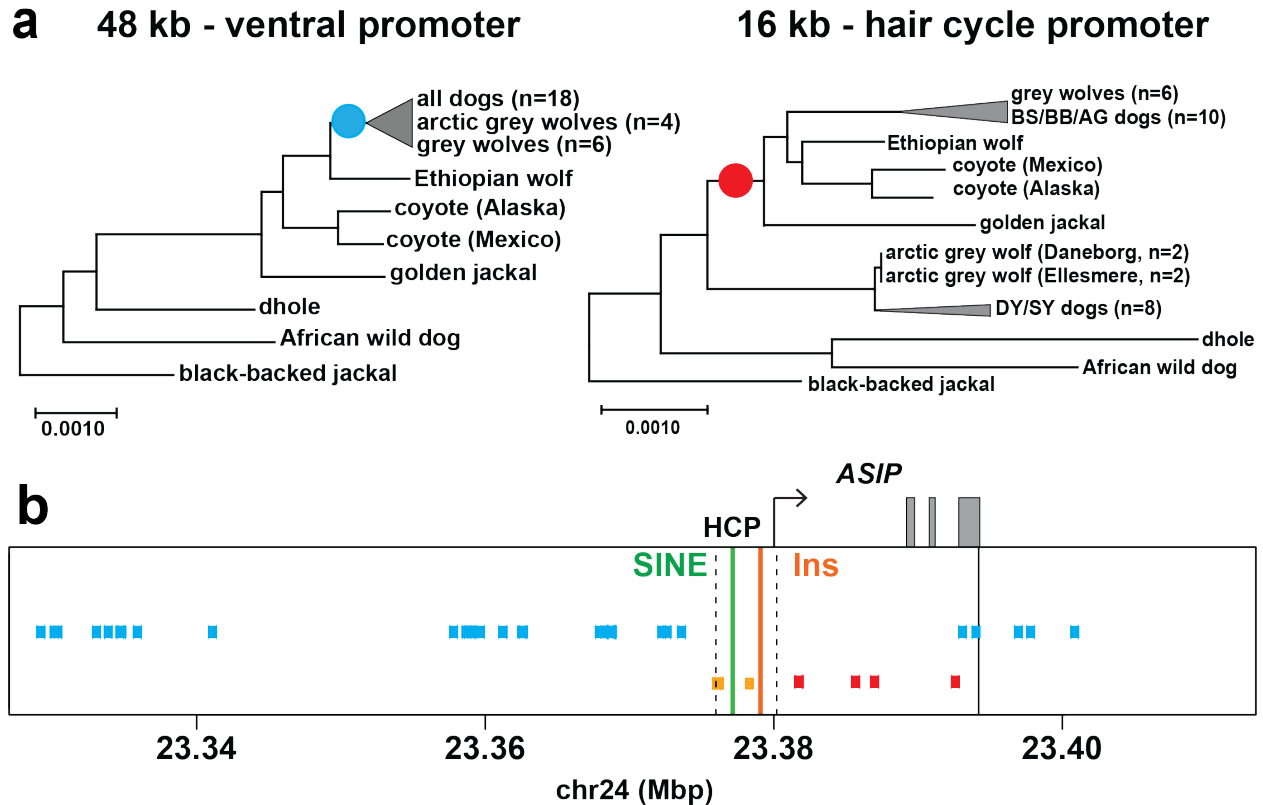

585

586 **Extended Data Fig. 6: Genomic distribution of derived substitutions across the *ASIP* locus.**

587 (a) Canid phylogenies for the ventral (48 kb) and hair cycle (16 kb) promoter regions, with  
588 relevant internal branches marked by the occurrence of derived variants plotted in (B). (b)

589 Derived substitutions shared by grey wolf and dogs (cyan). Ancestral alleles on DY/arctic wolf  
590 haplotypes (red) or BB and DY/arctic wolf haplotypes (orange) that correspond to derived  
591 substitutions in the core wolf-like canids (Supplementary Table 11). The broken lines demarcate  
592 the HCP region (chr24:23,375,800-23,380,000). The solid line signifies the downstream  
593 boundary for phylogenetic analysis. The solid green and orange lines indicate the positions of the  
594 SINE and 24 bp insertion, respectively, associated with the DY/arctic wolf haplotype.

595



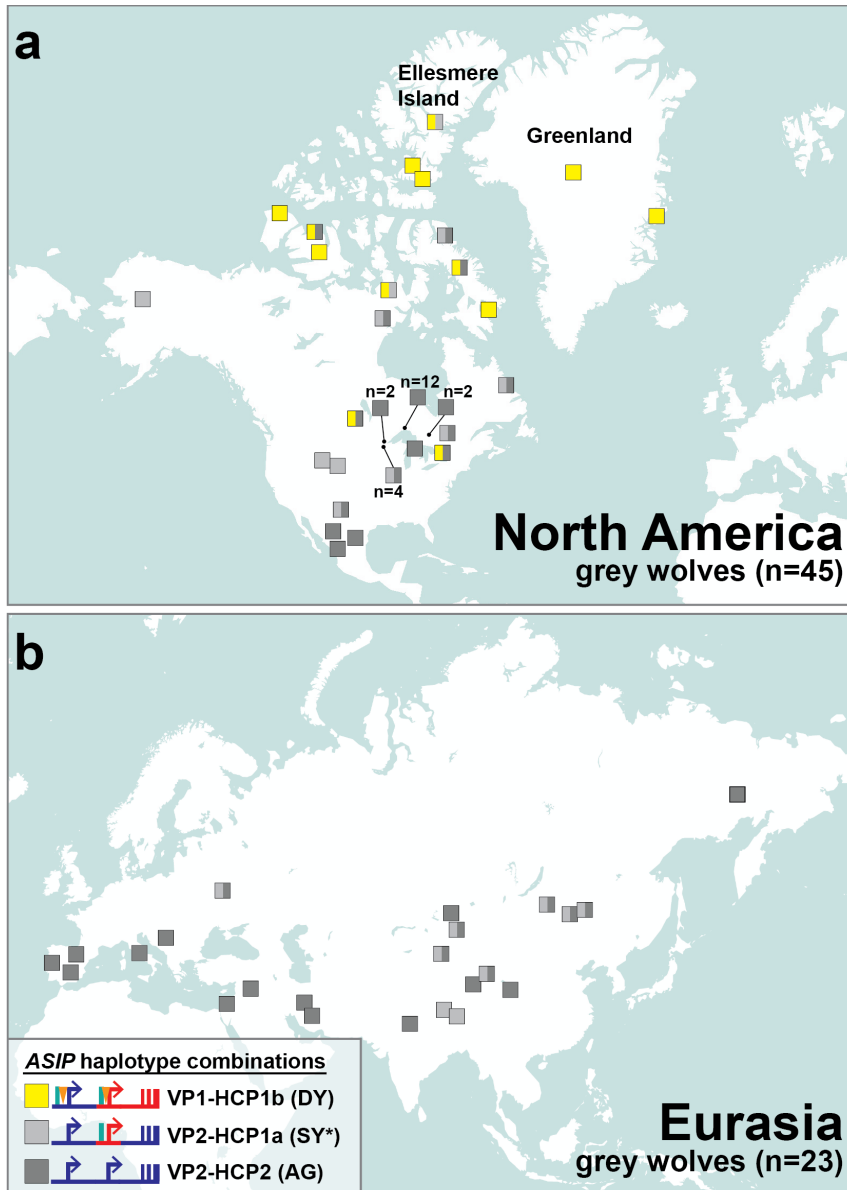

596

597 **Extended Data Fig. 7: The distribution of *ASIP* haplotypes in modern grey wolves.** Modern  
598 grey wolves from (a) North America (n=45) or (b) Eurasia (n=23) were genotyped for 5  
599 structural variants and 6 SNVs using whole genome sequencing data. Each wolf, represented by  
600 a colored box, is plotted information, summarized in the figure legend, is available in Extended  
601 Data Fig. 8 and Supplementary Table 10. The asterisk indicates an SY-like haplotype without the  
602 HCP1 insertion.

### Inferred ancestral *ASIP* haplotypes

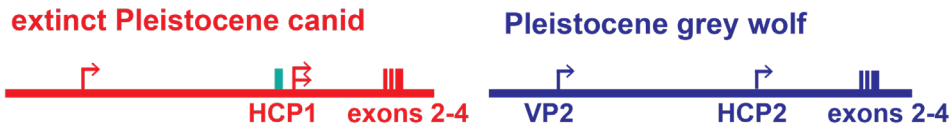

### Observed *ASIP* haplotypes

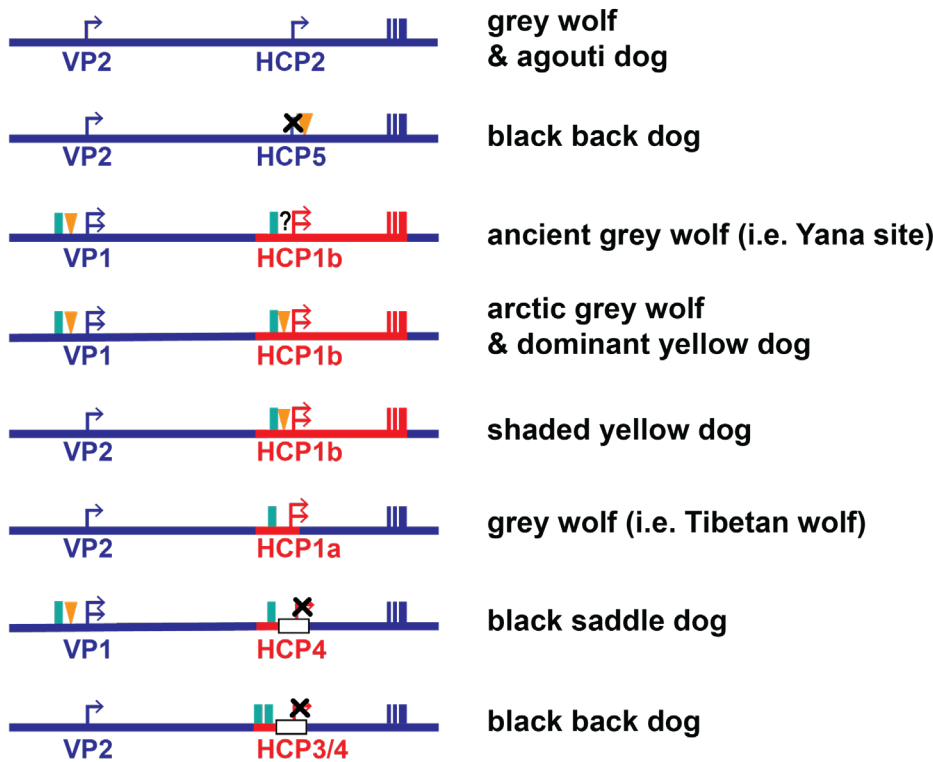

603

604 **Extended Data Fig. 8: Evolutionary diversification of *ASIP* haplotypes observed in grey**  
 605 **wolves and dogs.** The color (red or blue) of *ASIP* haplotype segments indicates ancestral species  
 606 of origin, inferred from phylogenetic analysis (Fig. 3b, Extended Data Fig. 4, 5). Relevant  
 607 structural variants near the ventral (VP) and hair cycle (HCP) promoters are depicted as yellow  
 608 triangles (polynucleotide expansions), green bars (SINE insertions), and white bars (deletions).  
 609 Modified promoter activity is indicated by an X mark (no activity) or an additional arrow  
 610 (elevated expression), based on RNAseq (Extended Data Fig. 1) and/or inference from coat color  
 611 (Fig. 1, 3c).

612 **Extended Data Table 1. Segregation of modular promoter diplotypes with phenotype.**  
 613

| Phenotype       | Diplotype                   | Counts  |
|-----------------|-----------------------------|---------|
| Dominant Yellow | VP1-HCP1 / VP1,2-HCP1,3,4,5 | 113/114 |
|                 | VP2-HCP1 / VP2-HCP1         | 1*/114  |
| Shaded Yellow   | VP2-HCP1 / VP2-HCP1,3,5     | 51/64   |
|                 | VP2-HCP1 / VP1-HCP1         | 11*/64  |
|                 | VP1-HCP1 / VP1-HCP1         | 2*/64   |
| Agouti          | VP2-HCP2 / VP2-HCP2,3,5     | 46/46   |
| Black Saddle    | VP1-HCP4 / VP1,2-HCP4,3     | 53/53   |
| Black Back      | VP2-HCP3 / VP2-HCP3,4,5     | 89/89   |

614

615 \* Dogs had MC1R based eumelanin masking pattern, which prevented reliable phenotype  
 616 distinction between dominant yellow and shaded yellow.

617

618 **Extended Data Table 2. SNVs distinguishing DY dogs and arctic wolves in the 64kb**  
 619 **segment that contain the VP, HCP, and coding sequences.**

620

| Position (Chr24, CF3) | Ancestral allele | Derived Allele | DY dog | Arctic wolf | Yana wolf |
|-----------------------|------------------|----------------|--------|-------------|-----------|
| 23,333,763            | C                | A              | C      | A           | C         |
| 23,343,447            | G                | C              | C      | G           | G         |
| 23,356,213            | T                | C              | T      | C           | T         |
| 23,362,891            | C                | A              | C      | A           | C         |
| 23,381,935            | C                | T              | C      | T           | C         |
| 23,393,514            | G                | A              | A      | G           | G         |

621

622

623

624

625
